# Supplementary material for: The Adenine at the 4th Exon of the DRO1 Gene Provides Drought-Tolerance Capacity to Hybrid Rice Deyou4727 and Its Maintainer Line Dexiang074B
Source: MDPI journal article supplement (doi:10.3390/agronomy12030752), 2022-03-21
Supplement: s1 [file s1]

Supplementary Materials

Table S1. The primer sequences used for qRT-PCR verification

| Gene ID      | Function Annotation | Forward primer              | Reverse Primer                 |
|--------------|---------------------|-----------------------------|--------------------------------|
| Os11g0137000 | OsPin1b             | 5'-CATCCTAACATTCTGAGCACA-3' | 5'-GTTATTGGAATGCTAAATAAGCTT-3' |
| Os01g0802700 | OsPin9              | 5'-CACCGCTGTAGGCCTAAGCA-3'  | 5'-CAGCCCCAACAGAATATAGT-3'     |
| Os11g0523800 | OsARF23             | 5'-CACCAGGTGCTACTGAATGG-3'  | 5'-CATCCACTCCTTCTTAGGACC-3'    |
| Os09g0439800 | DRO1                | 5'-CCGCAAAATTCTTCCACGCT-3'  | 5'-TTGCCAGGACCTTTGGAACC-3'     |

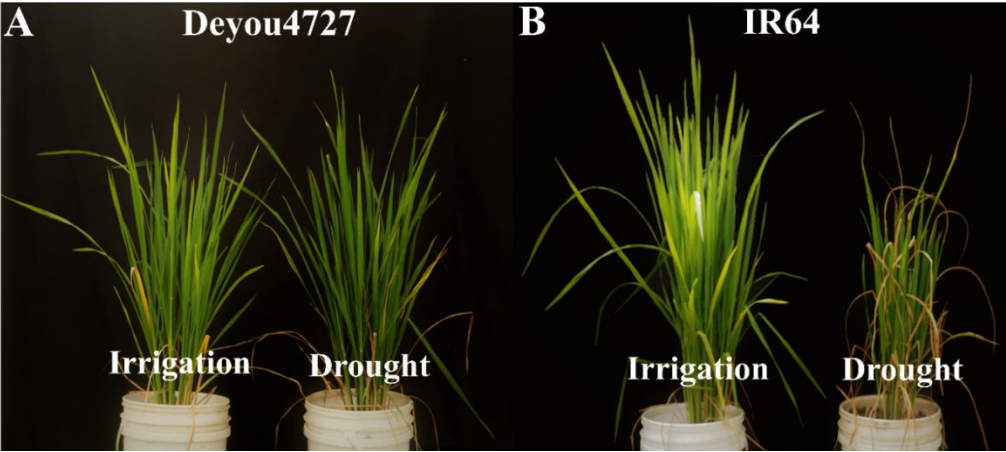

Figure S1. Impacts of drought stress during tiller growth of Deyou4727 (A), and IR64 (B).

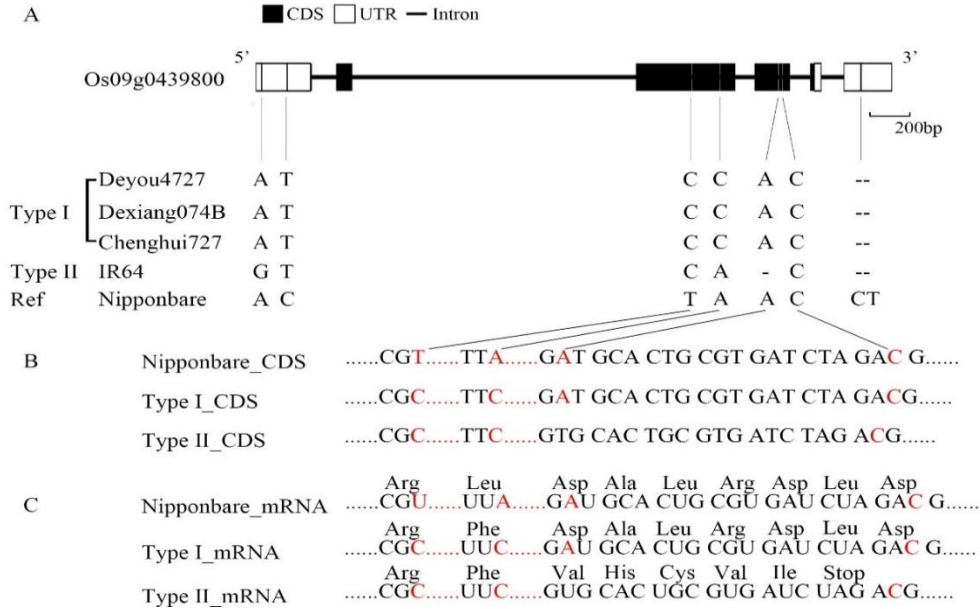

Figure S2. The open reading frame structure of the DRO1 gene in Deyou4727, its parents, and IR64.
